# Supplementary material for: Return of the Tbx5; lineage-tracing reveals ventricular cardiomyocyte-like precursors in the injured adult mammalian heart
Source: PubMed Central journal article supplement (PMC9984483; doi:10.1038/s41536-023-00280-9), 2023-03-03
Supplement: 41536_2023_280_MOESM1_ESM.pdf [file 41536_2023_280_MOESM1_ESM.pdf]

**A**

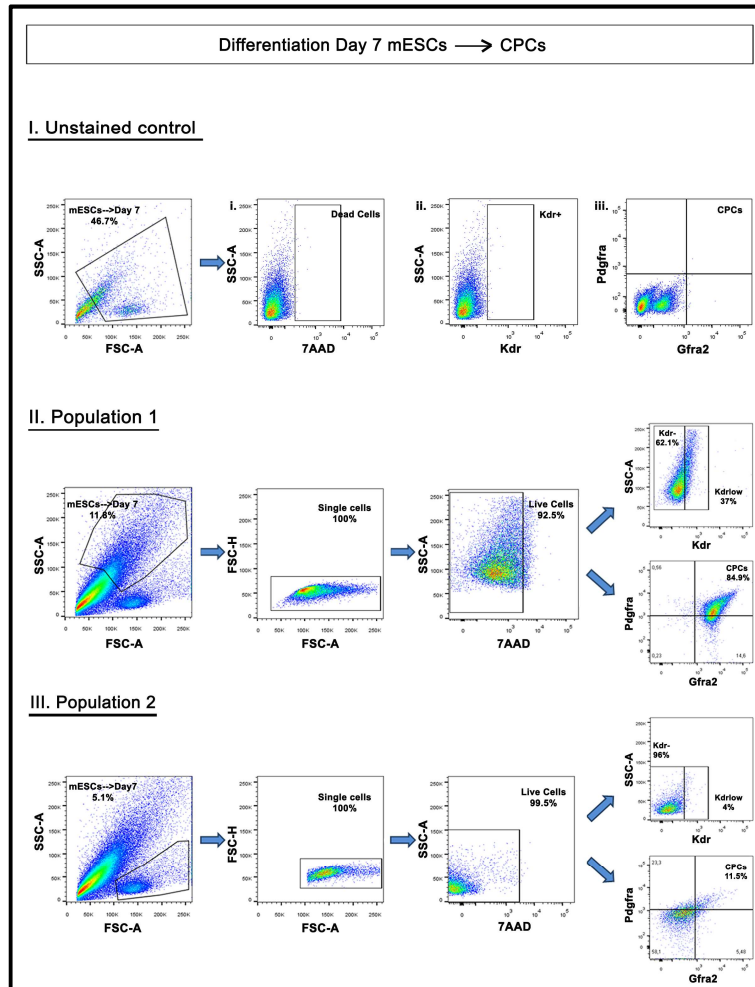

**B**

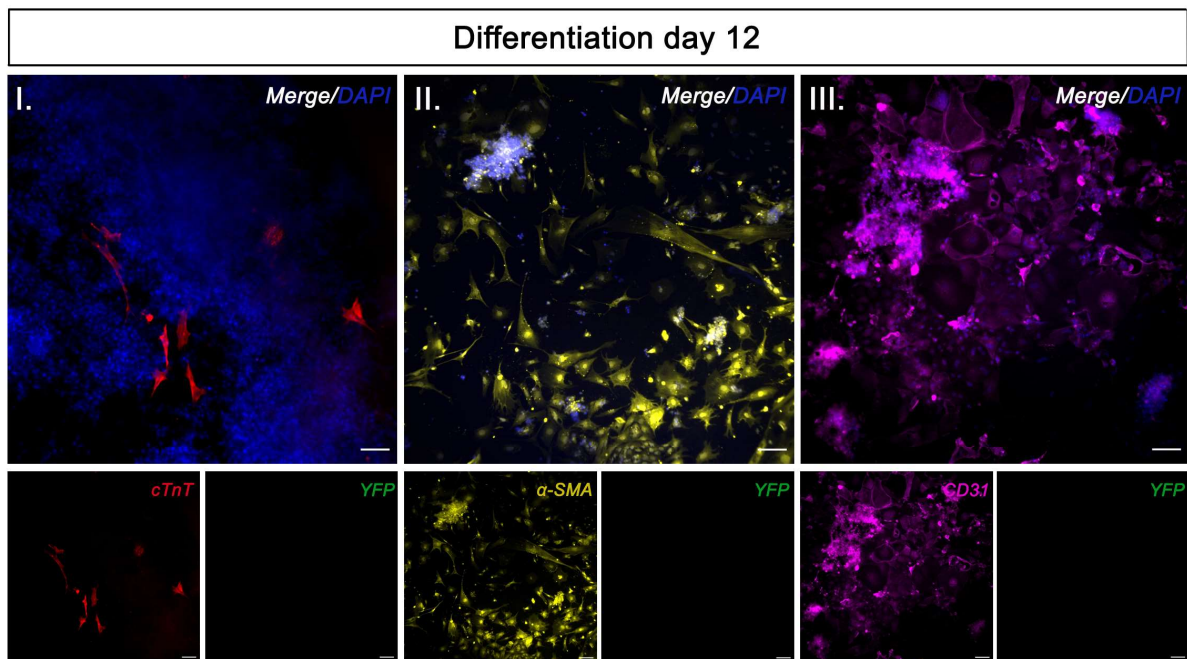

Supplementary Figure 1. **(A)** Gating strategy for acquiring triple positive cells from *in vitro* mESC in CM differentiation conditions, 7 days after 3i medium removal. **(B)** Immunocytochemical analysis of *Tbx5<sup>Cre</sup>;R26<sup>reYFP/eYFP</sup>* mESC-derived differentiated cells in suboptimal CM differentiation conditions, after 12 days *in vitro*. Scale bar = 100 $\mu$ m.

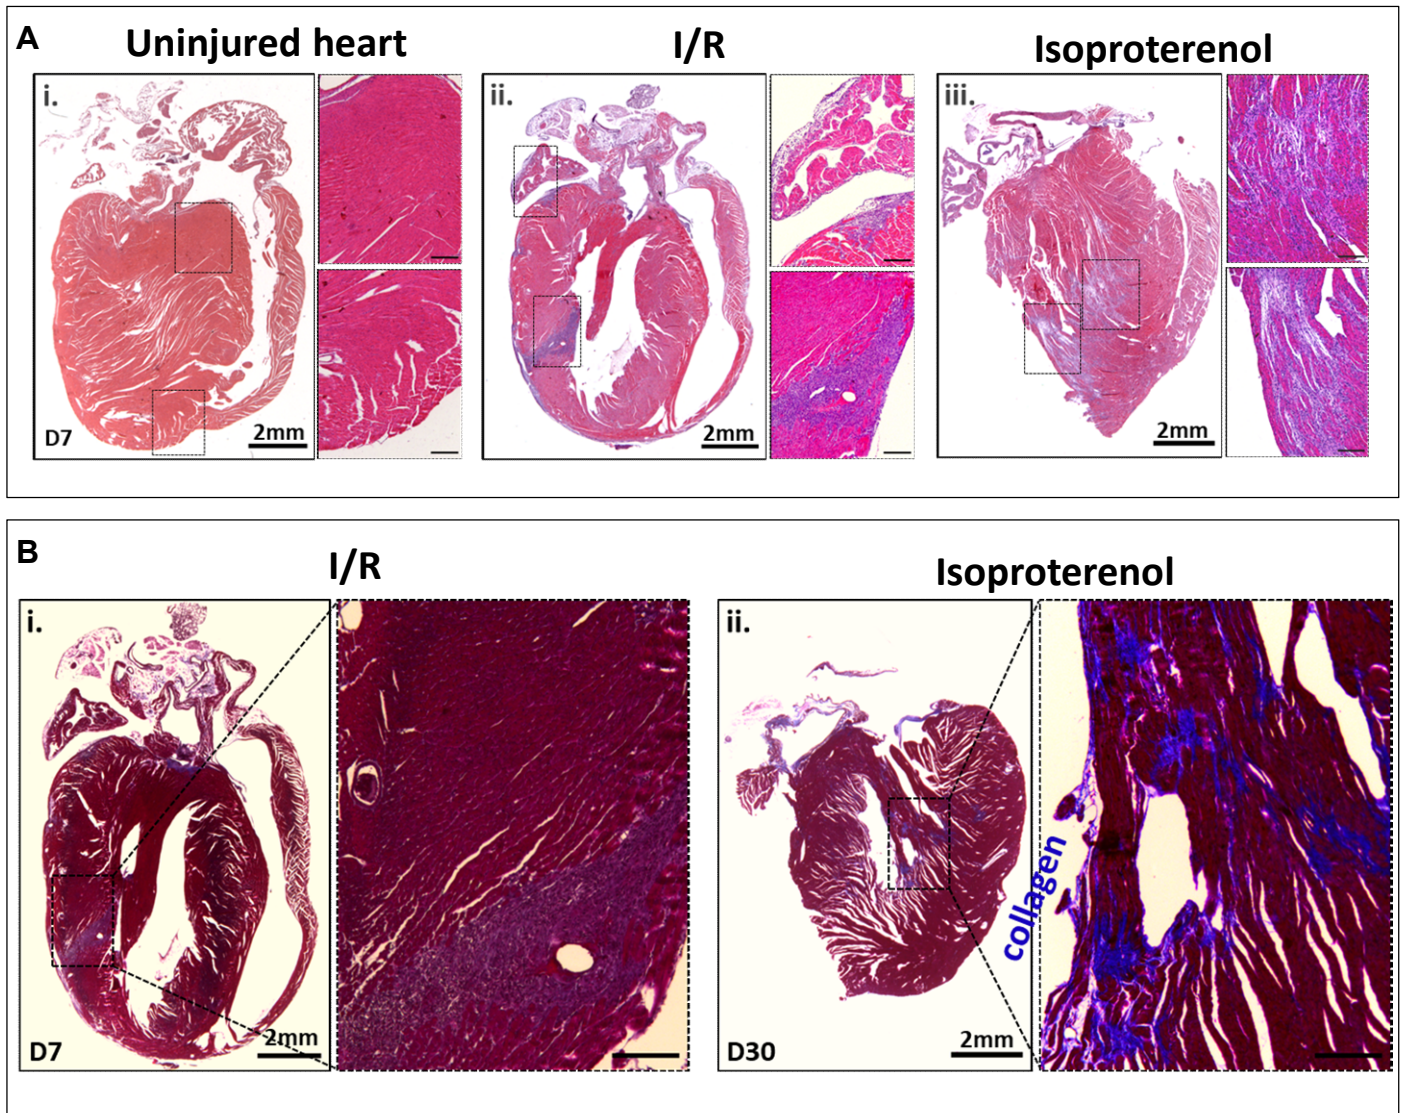

Supplementary Figure 2. (A) Haematoxylin and Eosin staining as well as whole heart photographs confirmed non-fatal, yet substantial, heart injury in the left ventricle, when compared to non-MI adult hearts. (B) Masson's staining, of collagen deposition at D7 and D30 after injury. N=1-3 per condition. Scale bar 100µm.

## Uninjured – D7

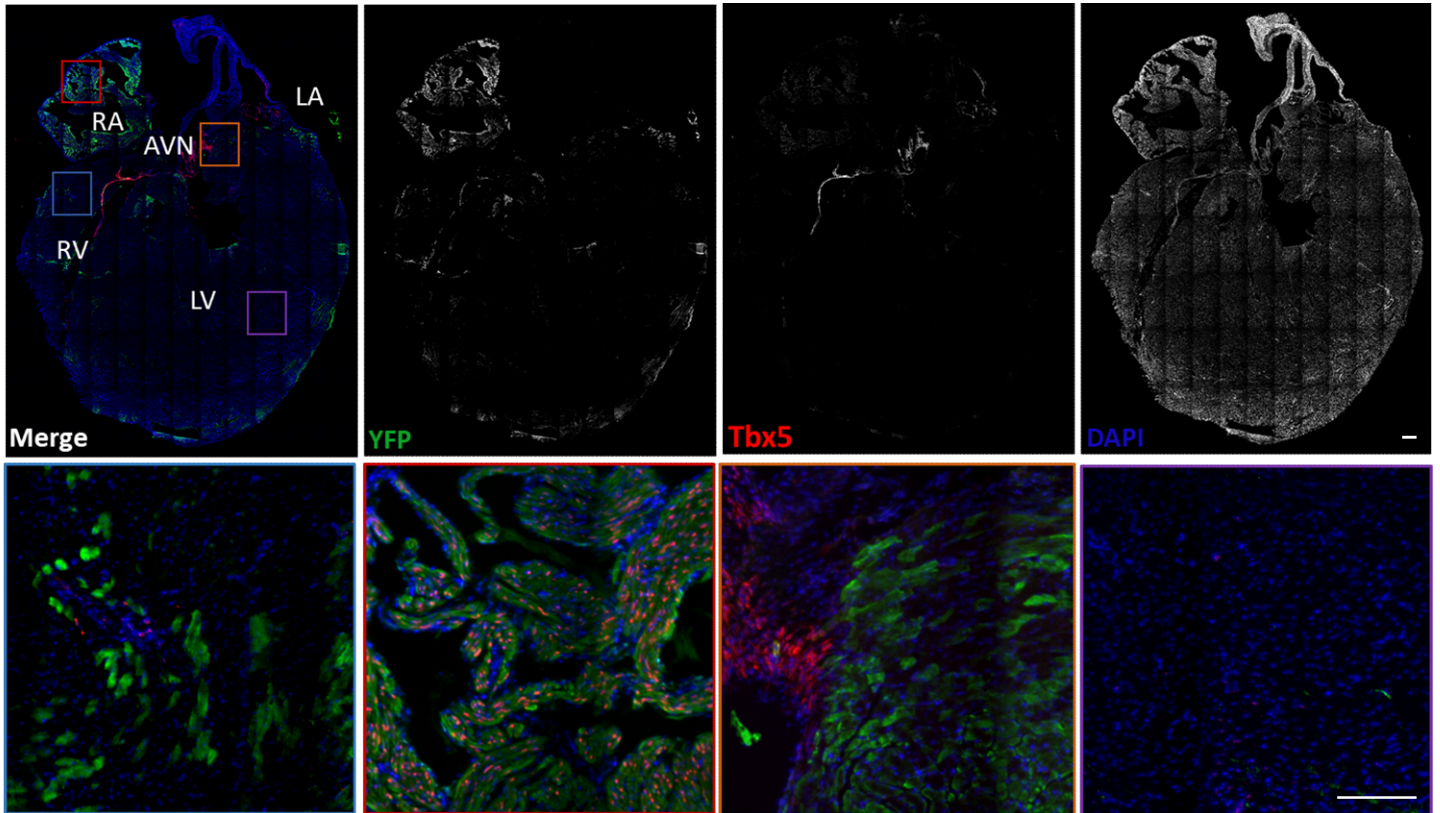

Supplementary Figure 3. A collage of an uninjured adult heart 7 days after receiving TAM. Inserts indicating  $(\alpha\text{-GFP}) \text{YFP}^+$  and  $\text{Tbx5}^+$  are located in the Atria and AVN only. Key- LV=Left Ventricle, RV=Right Ventricle, RA=Right Atrium, LA=Left Atrium, AVN=Atrioventricular Node, N=2-3 hearts. Scale bar=100 $\mu\text{m}$ .

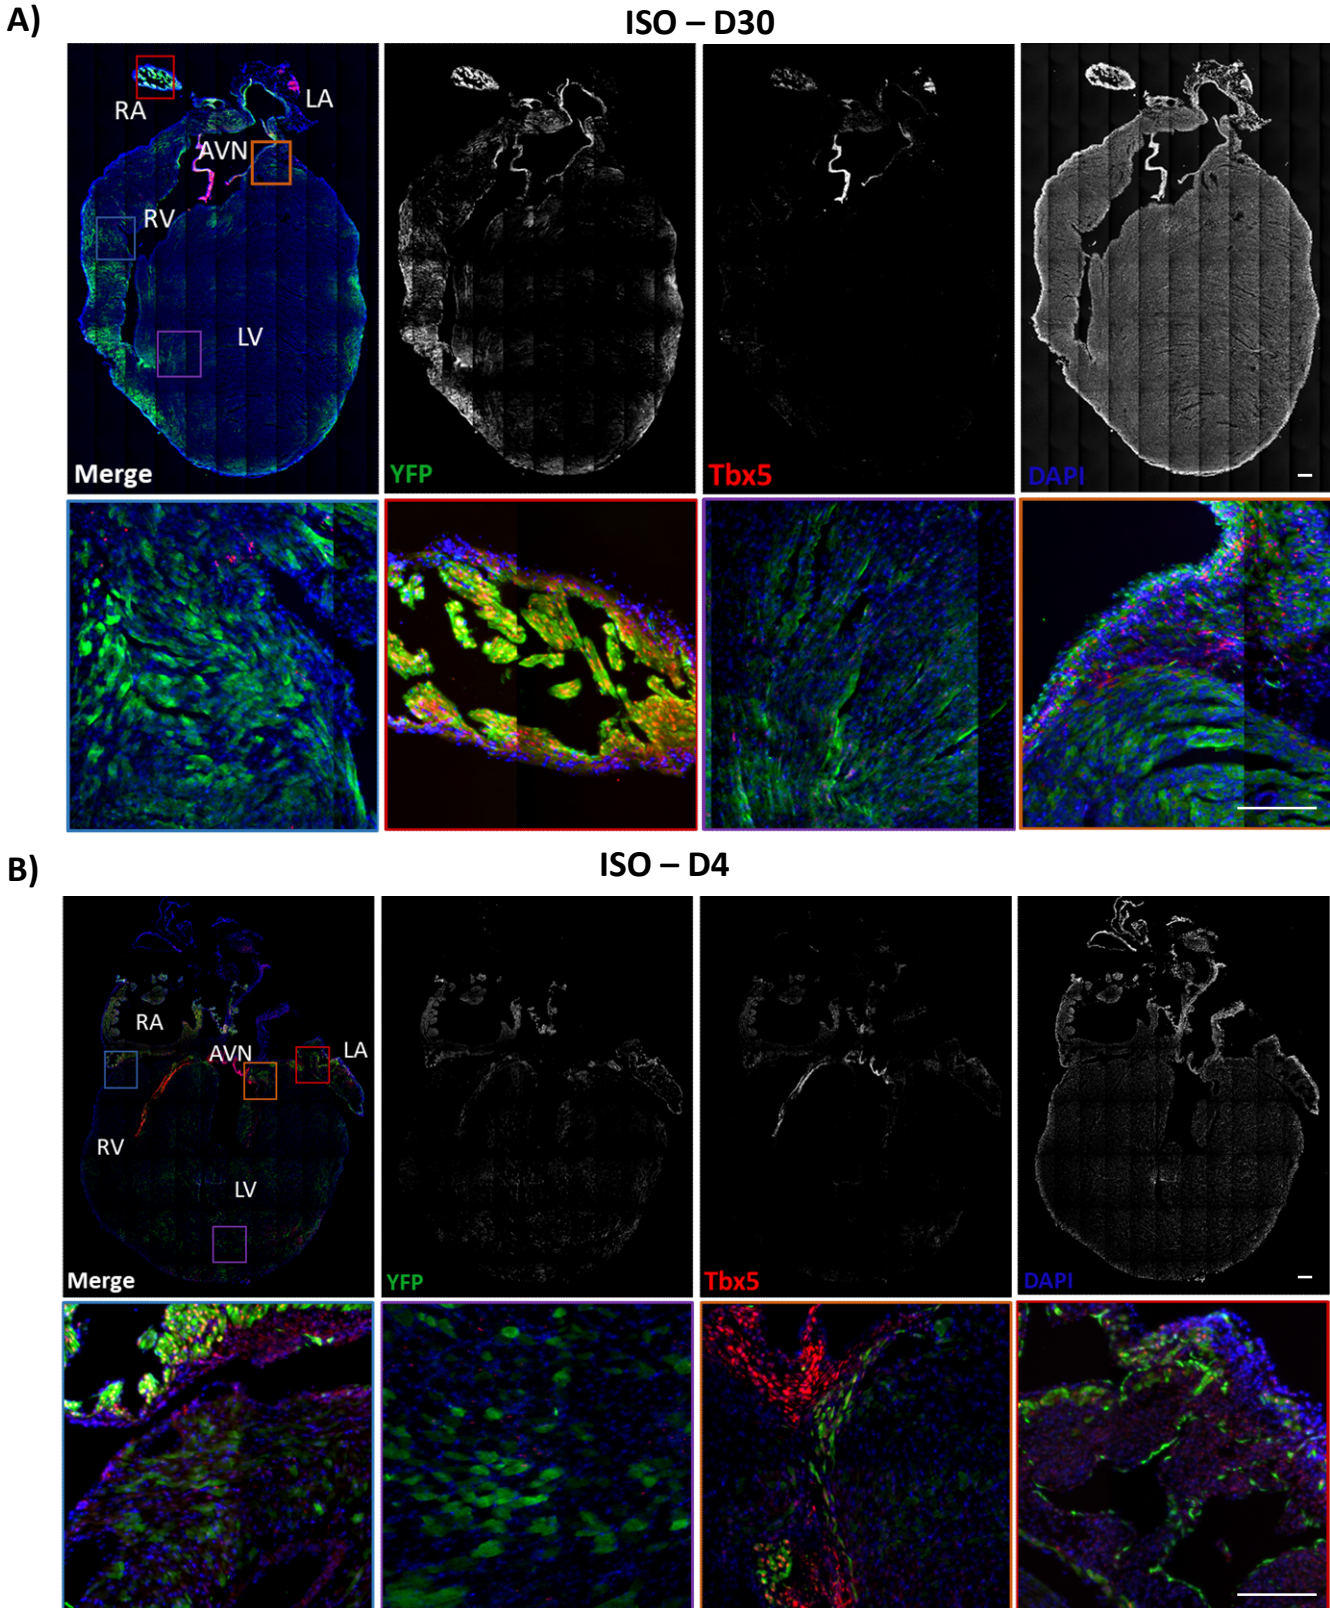

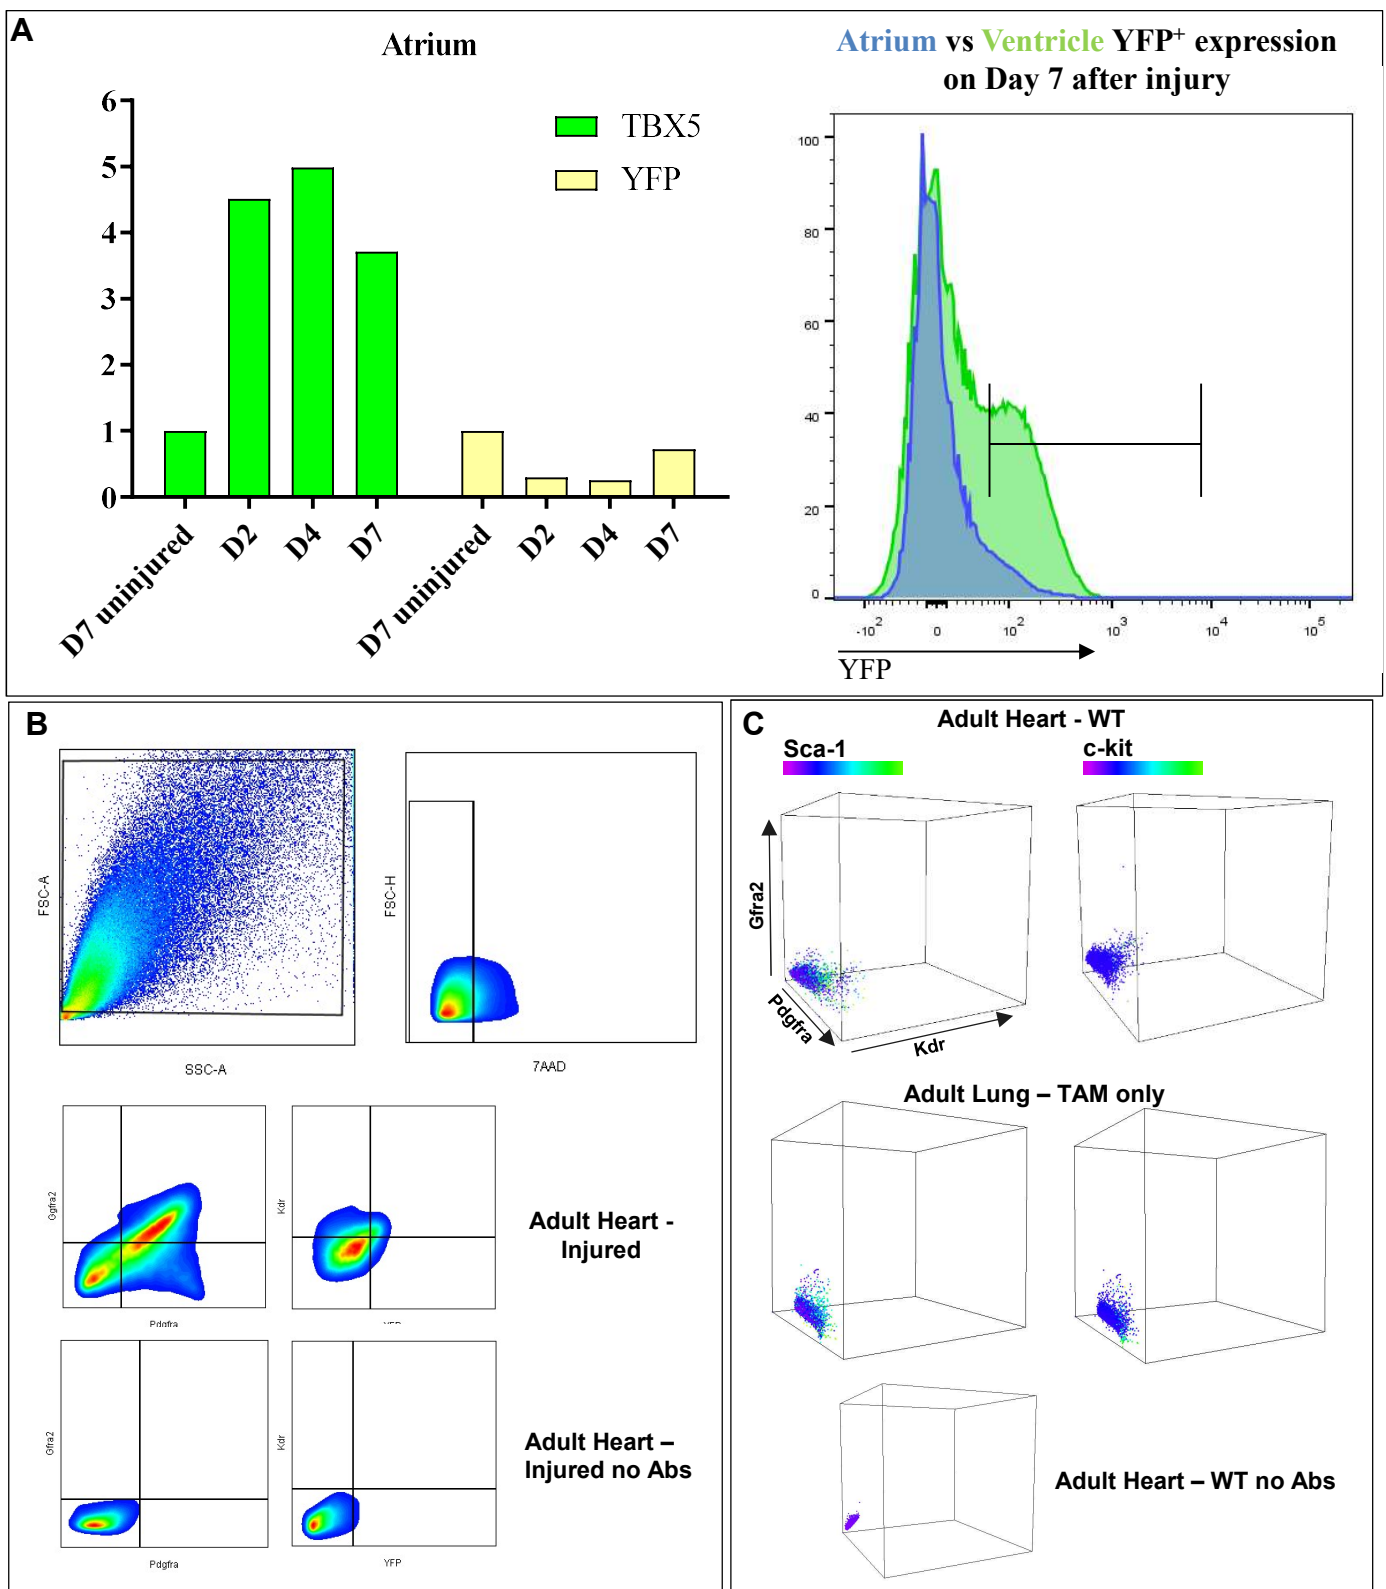

Supplementary Figure 5. **(A)** Real-time PCR analysis of *Yfp* and *Tbx5* transcripts in the atria of the adult heart in different time-points. Flow cytometry acquisition of YFP<sup>+</sup> cells from atria and ventricles seven days post-injury. **(B)** Representative graphs of flow cytometric gating strategy analysis from cardiac cells collected from adult injured hearts. **(C)** Representative graphs of flow cytometry acquisition of cardiac cells from uninjured heart and lung tissue.

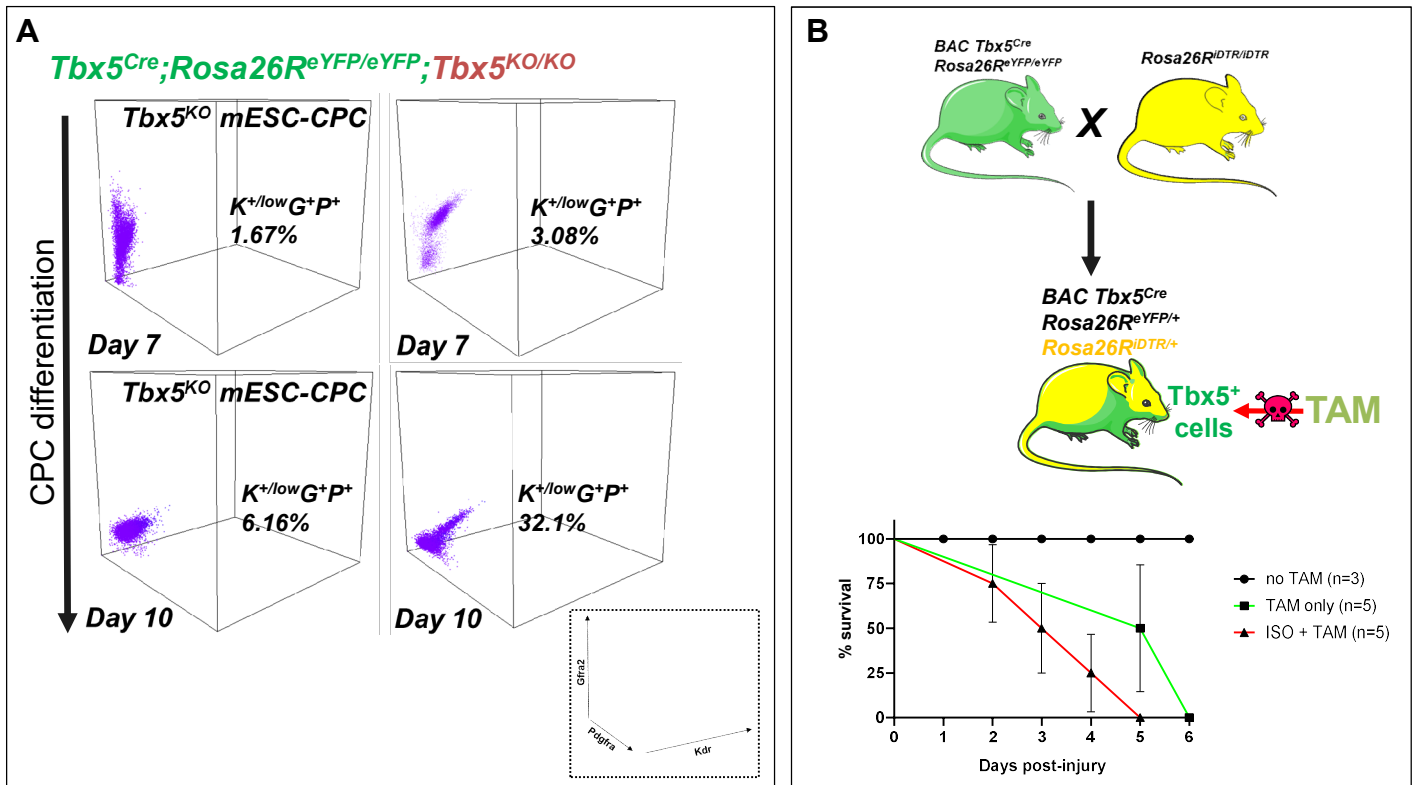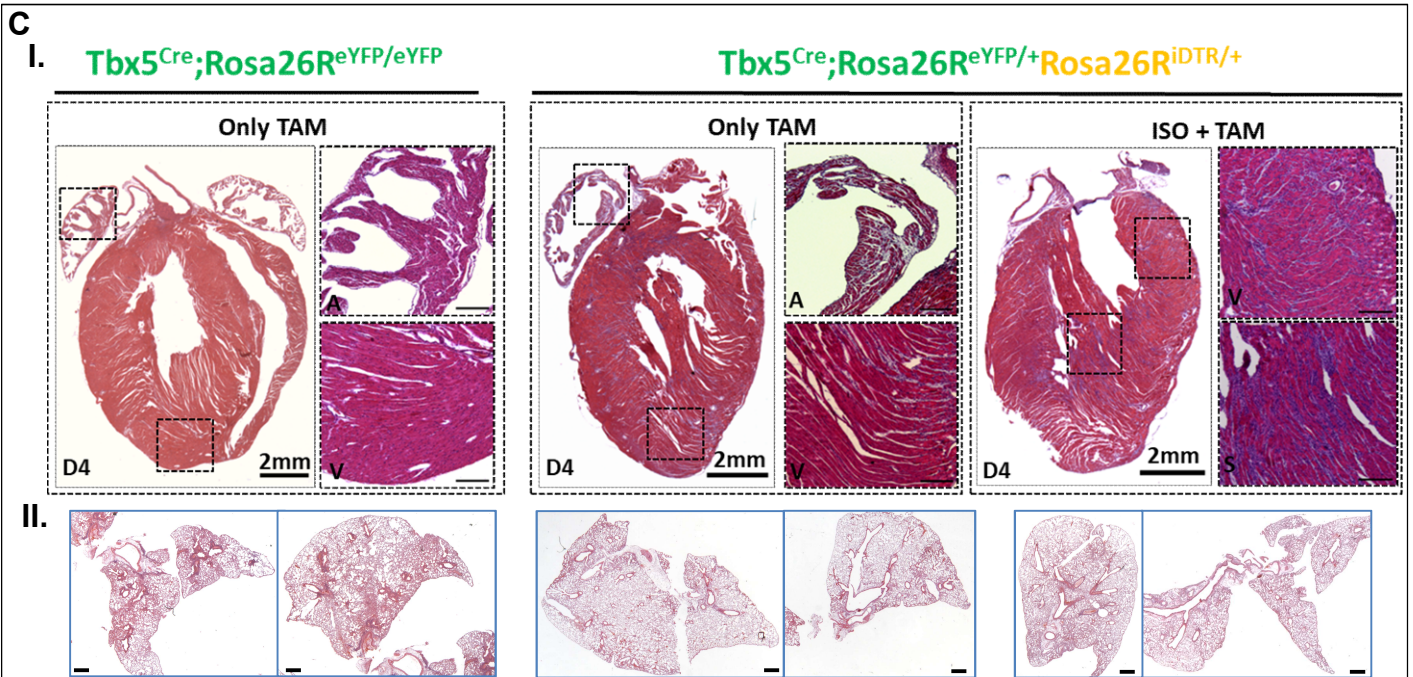

Supplementary Figure 6. (A) Representative three-dimensional graphs of flow cytometric acquisition of *Tbx5<sup>Cre</sup>Rosa26R<sup>eYFP/+</sup>Tbx5<sup>KO/KO</sup>*-mESC CPC after 7 and 10 days under *in vitro* differentiating conditions. Percentages are depicted as triple-positive CPC in total live cells. (B) *Tbx5<sup>Cre</sup>Rosa26R<sup>eYFP/+</sup>Rosa26R<sup>iDTR/+</sup>* cross and survival. Tamoxifen administration induces cells death to *Tbx5<sup>+</sup>*-expressing cells. (C) (I.) Photos of adult hearts with haematoxylin and eosin staining confirmed non-fatal, yet substantial, heart injury in the left ventricle and atria, when compared to injured adult hearts. N=3 hearts per condition (II.) Photos of adult lung tissue with haematoxylin and eosin staining indicative of alveolar damage in DTA mice. N=1-2 lungs per condition. Scale bar=2mm. Error bars = SEM.

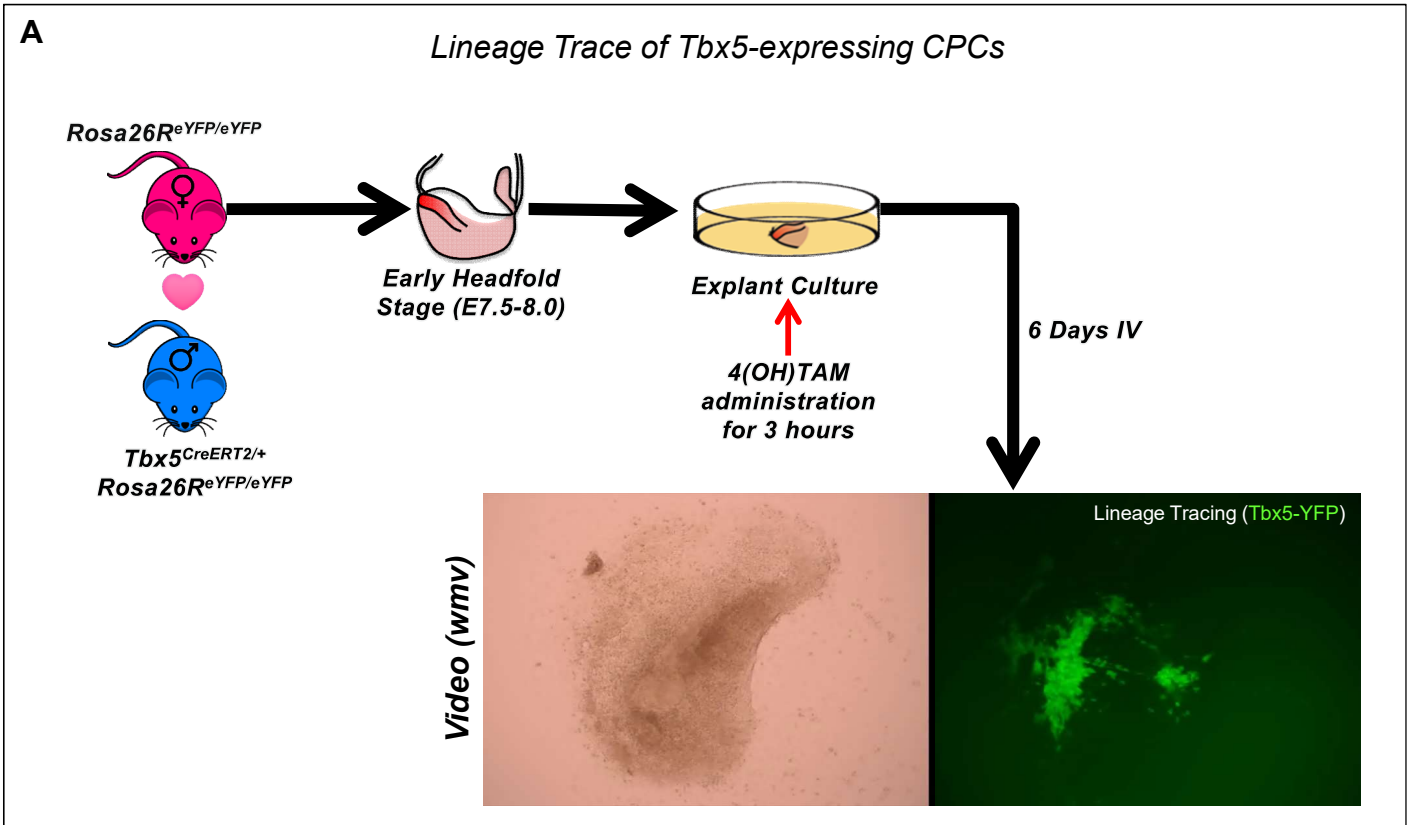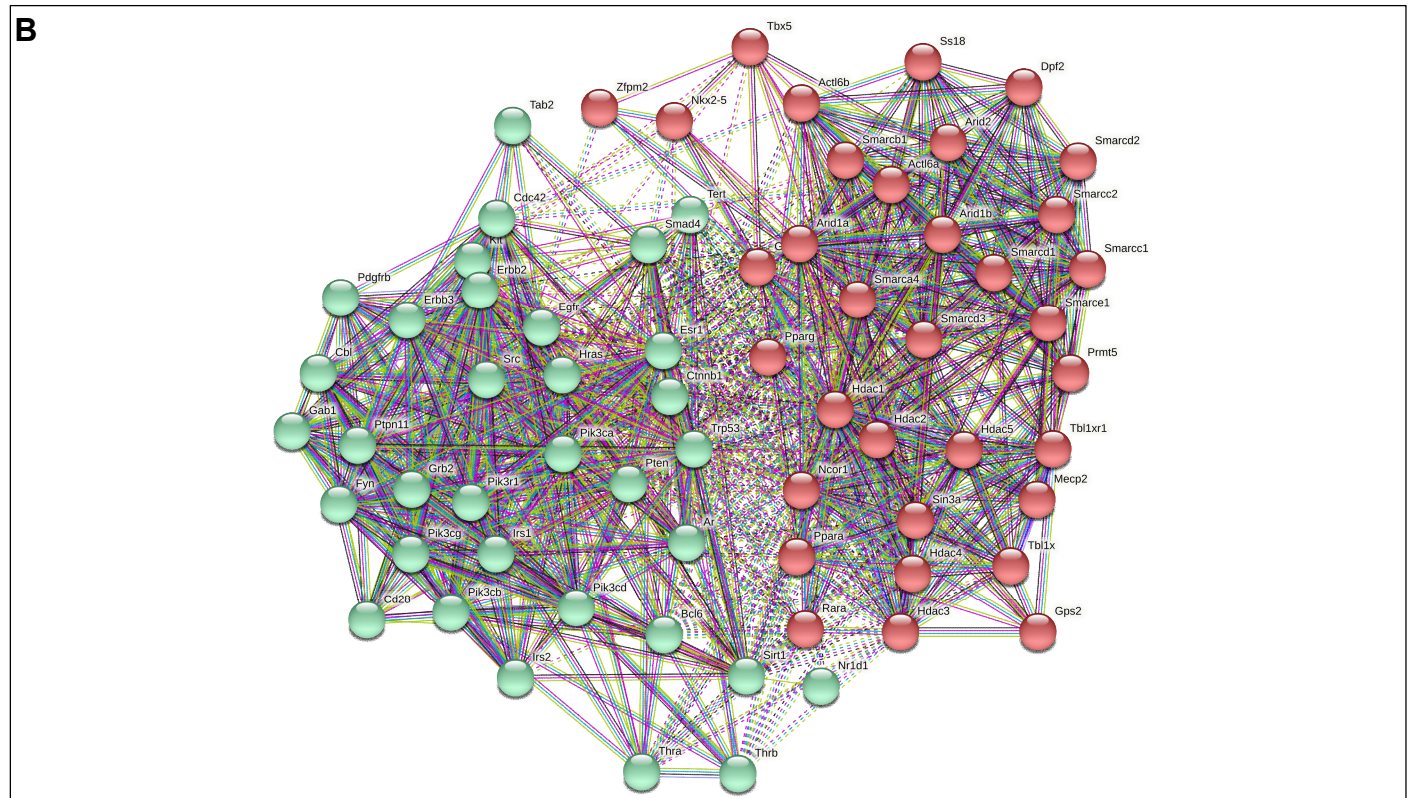

Supplementary Figure 7. **(A)** Non-beating cardiac tissue was extracted from EHF stage embryos, show beating *ex vivo* in the areas where Tbx5 (YFP) was expressed. Video indicates the beating of YFP<sup>+</sup> cardiac cells. **(B)** *Kmeans* STRING transcriptional network diagram of *Mus musculus* Tbx5-related and Thra/β proteins interactions.

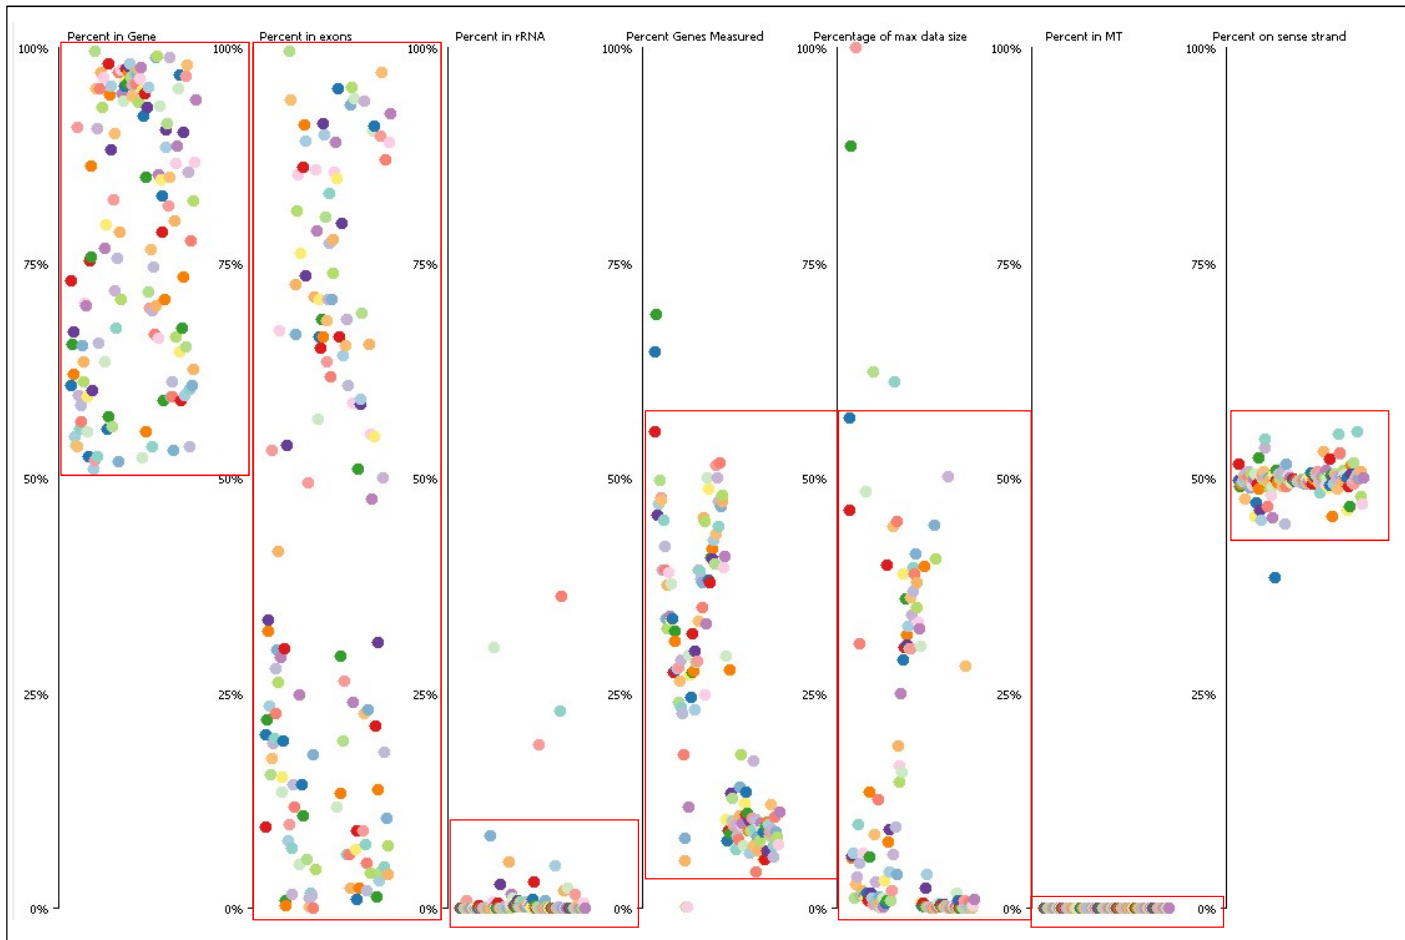

Supplementary Figure 8. Representative single-Cell RNA-seq QC report. In red, cut-off exclusion points for single-cells RNA-seq that have been chosen for downstream analysis (T-SNE, heatmaps, DEGs and GO/KEGG).



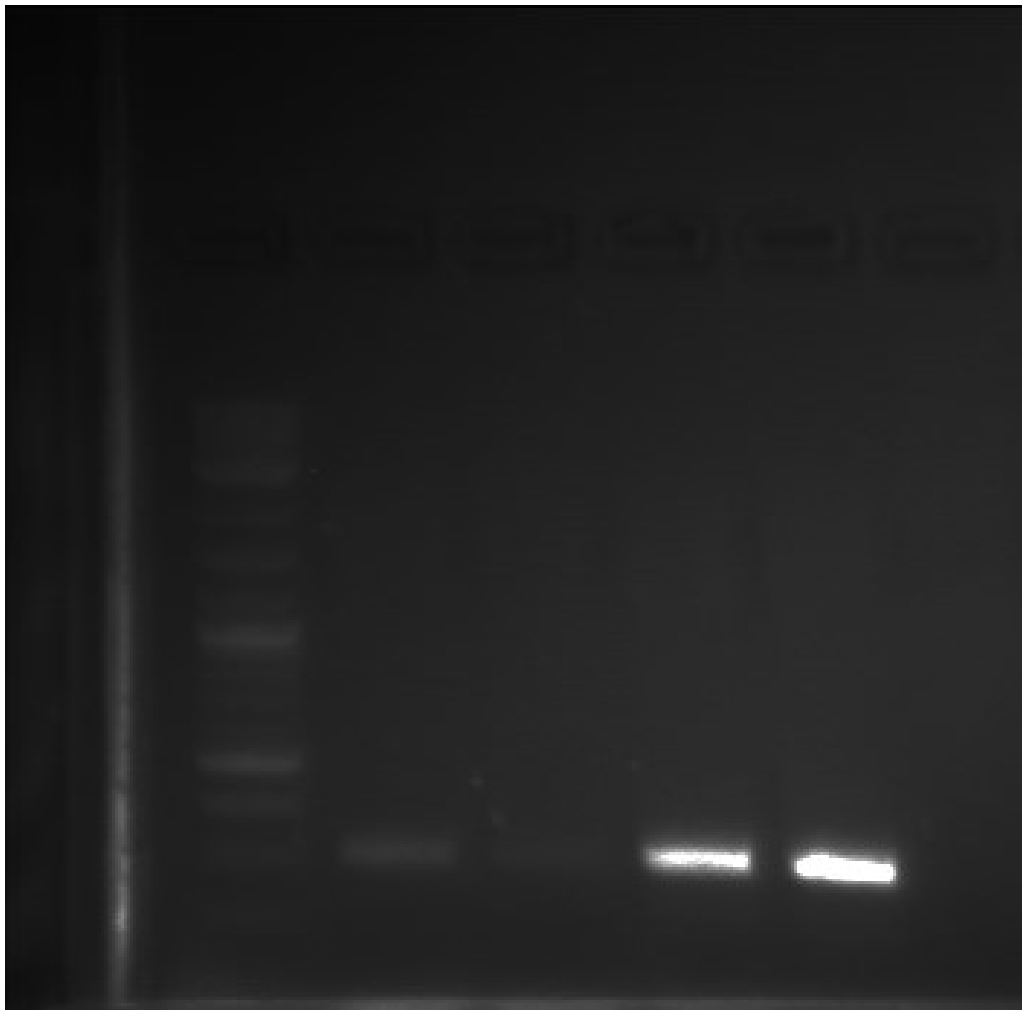

Supplementary Figure 9. Real-time PCR analysis of *Yfp* and *Tbx5* transcripts in the ventricles of the adult heart.

| Input Parameter                                                                         | Value                                                                                                                                                                                           |
|-----------------------------------------------------------------------------------------|-------------------------------------------------------------------------------------------------------------------------------------------------------------------------------------------------|
| Single-end or paired-end reads                                                          | paired                                                                                                                                                                                          |
| Custom or built-in reference genome                                                     | indexed                                                                                                                                                                                         |
| Reference genome with or without an annotation                                          | without-gtf                                                                                                                                                                                     |
| Select reference genome                                                                 | mm10full                                                                                                                                                                                        |
| Gene model (gff3,gtf) file for splice junctions                                         |                                                                                                                                                                                                 |
| Length of the genomic sequence around annotated junctions                               | 100                                                                                                                                                                                             |
| Use 2-pass mapping for more sensitive novel splice junction discovery                   | None                                                                                                                                                                                            |
| twopass_read_subset                                                                     | Empty.                                                                                                                                                                                          |
| sj_precomputed                                                                          | Empty.                                                                                                                                                                                          |
| Per gene/transcript output                                                              | -                                                                                                                                                                                               |
| Report chimeric alignments?                                                             | Don't report chimeric alignments                                                                                                                                                                |
| oformat                                                                                 |                                                                                                                                                                                                 |
| Read alignment tags to include in the BAM output                                        | NH (number of reported alignments/hits for the read) HI (query hit index) AS (local alignment score) nM (number of mismatches per (paired) alignment) ch (used to indicate chimeric alignments) |
| HI tag values should be                                                                 | one-based                                                                                                                                                                                       |
| outSAMprimaryflag                                                                       | OneBestScore                                                                                                                                                                                    |
| MAPQ value for unique mappers                                                           | 60                                                                                                                                                                                              |
| filter                                                                                  |                                                                                                                                                                                                 |
| Exclude the following records from the BAM output                                       | Nothing selected.                                                                                                                                                                               |
| Would you like to set additional output filters?                                        | yes                                                                                                                                                                                             |
| Would you like to keep only reads that contain junctions that passed filtering?         | FALSE                                                                                                                                                                                           |
| Score range below the maximum score for multimapping alignments                         | 1                                                                                                                                                                                               |
| Maximum number of alignments to output a read's alignment results, plus 1               | 10                                                                                                                                                                                              |
| Maximum number of mismatches to output an alignment, plus 1                             | 10                                                                                                                                                                                              |
| Maximum ratio of mismatches to mapped length                                            | 0.3                                                                                                                                                                                             |
| Maximum ratio of mismatches to read length                                              | 1                                                                                                                                                                                               |
| Minimum alignment score                                                                 | 0                                                                                                                                                                                               |
| Minimum alignment score, normalized to read length                                      | 0                                                                                                                                                                                               |
| Minimum number of matched bases                                                         | 20                                                                                                                                                                                              |
| Minimum number of matched bases, normalized to read length                              | 0                                                                                                                                                                                               |
| Maximum number of multimapping alignments to output for a read                          | -1                                                                                                                                                                                              |
| Calculation method for TLEN                                                             | leftmost base of the (+)strand mate to rightmost base of the (-)mate. (+)sign for the (+)strand mate                                                                                            |
| Configure seed, alignment and limits options                                            | full                                                                                                                                                                                            |
| seed                                                                                    |                                                                                                                                                                                                 |
| Search start point through the read                                                     | 30                                                                                                                                                                                              |
| Search start point through the read, normalized to read length                          | 1                                                                                                                                                                                               |
| Maximum length of seeds                                                                 | 0                                                                                                                                                                                               |
| Maximum number of mappings to use a piece in stitching                                  | 10000                                                                                                                                                                                           |
| Maximum number of seeds per read                                                        | 1000                                                                                                                                                                                            |
| Maximum number of seeds per window                                                      | 50                                                                                                                                                                                              |
| Maximum number of one seed loci per window                                              | 10                                                                                                                                                                                              |
| align                                                                                   |                                                                                                                                                                                                 |
| Minimum intron size                                                                     | 21                                                                                                                                                                                              |
| Maximum intron size                                                                     | 0                                                                                                                                                                                               |
| Maximum gap between two mates                                                           | 0                                                                                                                                                                                               |
| Minimum overhang for spliced alignments                                                 | 5                                                                                                                                                                                               |
| Minimum overhang for annotated spliced alignments                                       | 3                                                                                                                                                                                               |
| Minimum mapped length for a read mate that is spliced                                   | 0                                                                                                                                                                                               |
| Minimum mapped length for a read mate that is spliced, normalized to mate length        | 0.66                                                                                                                                                                                            |
| Maximum number of windows per read                                                      | 10000                                                                                                                                                                                           |
| Maximum number of transcripts per window                                                | 100                                                                                                                                                                                             |
| Maximum number of different alignments per read to consider                             | 10000                                                                                                                                                                                           |
| Use end-to-end read alignments, with no soft-clipping?                                  | FALSE                                                                                                                                                                                           |
| minimum number of overlap bases to trigger mates merging and realignment                | 0                                                                                                                                                                                               |
| maximum proportion of mismatched bases in the overlap area                              | 0.01                                                                                                                                                                                            |
| chim_settings                                                                           |                                                                                                                                                                                                 |
| Minimum length of chimeric segment                                                      | 12                                                                                                                                                                                              |
| Minimum total (summed) score of chimeric segments                                       | 0                                                                                                                                                                                               |
| Maximum difference of chimeric score from read length                                   | 20                                                                                                                                                                                              |
| Minimum difference between the best chimeric score and the next one                     | 10                                                                                                                                                                                              |
| Penalty for a non-GT/AG chimeric junction                                               | -1                                                                                                                                                                                              |
| Minimum overhang for a chimeric junction                                                | 20                                                                                                                                                                                              |
| Maximum gap in the read sequence between chimeric segments                              | 0                                                                                                                                                                                               |
| Discard chimeric alignments with Ns in the genome sequence around the chimeric junction | TRUE                                                                                                                                                                                            |
| Maximum number of multi-alignments for the main chimeric segment.                       | 10                                                                                                                                                                                              |
| Maximum number of chimeric multi-alignments                                             | 1                                                                                                                                                                                               |
| Score range for multi-mapping chimeras                                                  | 1                                                                                                                                                                                               |
| limits                                                                                  |                                                                                                                                                                                                 |
| Maximum number of junctions for one read (including all multimappers)                   | 1000                                                                                                                                                                                            |
| Maximum number of collapsed junctions                                                   | 1000000                                                                                                                                                                                         |
| Maximum number of inserts to be inserted into the genome on the fly.                    | 1000000                                                                                                                                                                                         |
| Number of genome bins for coordinate-sorting                                            | 50                                                                                                                                                                                              |

Supplementary Table 1. Parameters for aligning FASTQ raw data on the mm10 mouse genome using the RNA-STAR tool in <http://www.usegalaxy.eu>
